# Supplementary material
Source: Springer Nature journal article supplement (https://www.springermedizin.de/resource/supplementary/12885_2009_2050_MOESM3_ESM.pdf/9460398)

Naive immune defence  
Starts homeostasis  
Starts infection

environment

tissues

Lymph

lymph node

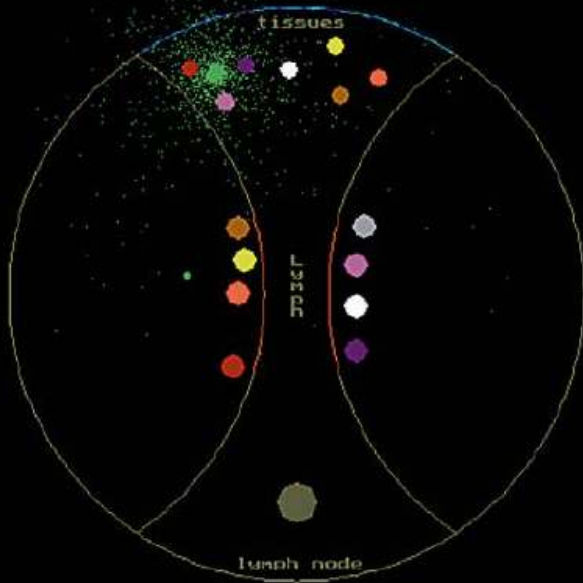

Supplement: MOESM3 [file 9460398]
